# Supplementary material
Source: PubMed Central journal article supplement (PMC9301590)

## Supplemental Online Content

Tabrizian P, Holzner ML, Mehta N, et al. Ten-year outcomes of liver transplant and downstaging for hepatocellular carcinoma. *JAMA Surg*. Published online July 20, 2022. doi:10.1001/jamasurg.2022.2800

**eTable 1.** Factors Associated With Posttransplant HCC Recurrence and Poor Overall Survival

**eTable 2.** Clinicopathologic Characteristics of Liver Transplant Recipients by Tumor Recurrence

**eTable 3.** Comparison of Recurrent Tumor Characteristics by Treatment Modality

**eTable 4.** Factors Associated With Survival After Liver Transplantation

**eFigure 1.** Cohort Diagram

**eFigure 2.** Overall Survival and Recurrence of the Whole Cohort of 2645 Patients With HCC After Transplantation

This supplemental material has been provided by the authors to give readers additional information about their work.

**eTable 1. Factors Associated With Posttransplant HCC Recurrence and Poor Overall Survival**

| Predictor                                                                   | HCC Recurrence     |         |                    |         | Overall survival   |         |                    |         |  |
|-----------------------------------------------------------------------------|--------------------|---------|--------------------|---------|--------------------|---------|--------------------|---------|--|
|                                                                             | Univariable        |         | Multivariable      |         | Univariable        |         | Multivariable      |         |  |
|                                                                             | HR (95% CI)        | P Value |  |
| <b><i>Pretransplant factors</i></b>                                         |                    |         |                    |         |                    |         |                    |         |  |
| <b>Beyond Milan criteria at time of transplant</b>                          | 3.45 (2.62 - 4.53) | < 0.001 | 1.82 (1.32 - 2.49) | < 0.001 | 1.68 (1.36 - 2.07) | < 0.001 | 1.22 (0.97 - 1.54) | 0.092   |  |
| <b>Downstaged to within Milan criteria</b>                                  | 1.37 (1.02 - 1.83) | 0.035   | 1.09 (0.79 - 1.51) | 0.592   | 1.19 (0.99 - 1.45) | 0.07    | 1.16 (0.95 - 1.42) | 0.258   |  |
| <b>Number of pretransplant locoregional therapies</b>                       |                    |         |                    |         |                    |         |                    |         |  |
| 0                                                                           | Reference          | -       | Reference          | -       | Reference          | -       | Reference          | -       |  |
| 1                                                                           | 0.70 (0.48 - 1.01) | 0.059   | 1.12 (0.76 - 1.65) | 0.571   | 0.83 (0.68 - 1.01) | 0.056   | 1.08 (0.87 - 1.45) | 0.472   |  |
| 2                                                                           | 1.12 (0.79 - 1.59) | 0.526   | 1.53 (1.06 - 2.21) | 0.024   | 0.87 (0.71 - 1.07) | 0.192   | 1.11 (0.88 - 1.41) | 0.360   |  |
| 3 or more                                                                   | 1.77 (1.26 - 2.50) | 0.001   | 2.11 (1.46 - 3.04) | < 0.001 | 0.98 (0.79 - 1.21) | 0.85    | 1.15 (0.90 - 1.46) | 0.267   |  |
| <b>Laboratory MELD score (per unit increase)</b>                            | 1.00 (0.99 - 1.02) | 0.878   |                    |         | 1.02 (1.01 - 1.03) | < 0.001 | 1.02 (1.01 - 1.03) | 0.001   |  |
| <b>Neutrophil-to-lymphocyte ratio at transplant (per log unit increase)</b> | 1.17 (1.01 - 1.36) | 0.041   | 1.16 (0.99 - 1.35) | 0.055   | 1.21 (1.10 - 1.33) | < 0.001 | 1.12 (1.01 - 1.25) | 0.033   |  |
| <b>Alpha-fetoprotein at time of transplant - ng/mL</b>                      |                    |         |                    |         |                    |         |                    |         |  |
| < 20                                                                        | Reference          | -       | Reference          | -       | Reference          | -       | Reference          | -       |  |
| 20 - 199                                                                    | 2.30 (1.79 - 2.96) | < 0.001 | 1.72 (1.33 - 2.23) | < 0.001 | 1.42 (1.21 - 1.66) | < 0.001 | 1.28 (1.09 - 1.51) | 0.003   |  |
| 200 - 1000                                                                  | 3.43 (2.45 - 4.81) | < 0.001 | 2.29 (1.62 - 3.23) | < 0.001 | 1.60 (1.24 - 2.06) | < 0.001 | 1.37 (1.05 - 1.77) | 0.019   |  |
| > 1000                                                                      | 5.06 (3.35 - 7.65) | < 0.001 | 2.20 (1.36 - 3.55) | 0.001   | 1.81 (1.30 - 2.54) | < 0.001 | 1.18 (0.82 - 1.69) | 0.387   |  |
| <b><i>Posttransplant factors</i></b>                                        |                    |         |                    |         |                    |         |                    |         |  |
| <b>Size of largest viable tumor on explant (per cm increase)</b>            | 1.23 (1.20 - 1.27) | < 0.001 | 1.12 (1.04 - 1.17) | < 0.001 | 1.13 (1.10 - 1.15) | < 0.001 | 1.07 (1.04 - 1.11) | < 0.001 |  |
| <b>Tumor differentiation</b>                                                |                    |         |                    |         |                    |         |                    |         |  |

|                          |                     |         |  |                    |         |  |                    |         |  |                    |         |
|--------------------------|---------------------|---------|--|--------------------|---------|--|--------------------|---------|--|--------------------|---------|
| Necrotic/no viable tumor | Reference           | -       |  | Reference          | -       |  | Reference          | -       |  | Reference          | -       |
| Well                     | 1.98 (1.24 - 3.16)  | 0.004   |  | 1.29 (0.79 - 2.11) | 0.302   |  | 1.14 (0.92 - 1.42) | 0.230   |  | 0.82 (0.64 - 1.05) | 0.113   |
| Moderate                 | 3.49 (2.34 - 5.19)  | < 0.001 |  | 1.62 (1.04 - 2.51) | < 0.001 |  | 1.42 (1.19 - 1.72) | < 0.001 |  | 0.90 (0.72 - 1.12) | 0.345   |
| Poor                     | 8.41 (5.51 - 12.85) | < 0.001 |  | 2.74 (1.69 - 4.45) | < 0.001 |  | 2.17 (1.72 - 2.73) | < 0.001 |  | 1.12 (0.85 - 1.48) | 0.427   |
| <b>Vascular invasion</b> |                     |         |  |                    |         |  |                    |         |  |                    |         |
| None                     | Reference           | -       |  | Reference          | -       |  | Reference          | -       |  | Reference          | -       |
| Microvascular            | 3.12 (2.47 - 3.92)  | < 0.001 |  | 1.78 (1.38 - 2.29) | < 0.001 |  | 1.77 (1.52 - 2.07) | < 0.001 |  | 1.45 (1.23 - 1.73) | < 0.001 |
| Macrovascular            | 7.01 (4.76 - 10.32) | < 0.001 |  | 2.69 (1.75 - 4.15) | < 0.001 |  | 3.49 (2.62 - 4.65) | < 0.001 |  | 2.45 (1.79 - 3.37) | < 0.001 |

**eTable 2.** Clinicopathologic Characteristics of Liver Transplant Recipients by Tumor Recurrence

| Variable                                                             | Recurrent HCC<br>(n=330) | No recurrent<br>HCC<br>(n=2315) | P<br>Value |
|----------------------------------------------------------------------|--------------------------|---------------------------------|------------|
| Milan criteria at time of transplant - no. (%)                       |                          |                                 | <0.001     |
| Within                                                               | 266 (80.6)               | 2197 (94.9)                     |            |
| Beyond                                                               | 64 (19.4)                | 118 (5.1)                       |            |
| Number of pretransplant LRT - no. (%)                                |                          |                                 | <0.001     |
| 0                                                                    | 46 (14.1)                | 341 (14.8)                      |            |
| 1                                                                    | 70 (21.4)                | 801 (34.8)                      |            |
| 2                                                                    | 96 (29.4)                | 664 (28.8)                      |            |
| 3 or more                                                            | 115 (35.2)               | 497 (21.6)                      |            |
| Downstaged to within Milan - no. (%)                                 | 54 (16.4)                | 287 (12.4)                      | 0.044      |
| Maximum AFP - no. (%)                                                |                          |                                 | <0.001     |
| < 20                                                                 | 120 (37.0)               | 1372 (61.0)                     |            |
| 20 - 199                                                             | 113 (34.9)               | 600 (26.7)                      |            |
| 200 - 1000                                                           | 54 (16.7)                | 192 (8.5)                       |            |
| > 1000                                                               | 37 (11.4)                | 84 (3.7)                        |            |
| Pretransplant AFP - no. (%)                                          |                          |                                 | <0.001     |
| < 20                                                                 | 143 (44.1)               | 1568 (70.7)                     |            |
| 20 - 199                                                             | 107 (33.0)               | 493 (22.2)                      |            |
| 200 - 1000                                                           | 46 (14.2)                | 118 (5.3)                       |            |
| > 1000                                                               | 28 (8.6)                 | 39 (1.8)                        |            |
| Pretransplant NLR - median (IQR)                                     | 3.1 (1.9-4.7)            | 2.7 (1.8-4.3)                   | 0.043      |
| Size of largest viable tumor on explant pathology - median (IQR), cm | 3.0 (2.0-5.0)            | 1.8 (0-3.0)                     | <0.001     |
| Tumor differentiation - no. (%)                                      |                          |                                 | <0.001     |
| Necrotic/no viable tumor                                             | 28 (8.6)                 | 598 (26.3)                      |            |
| Well                                                                 | 46 (14.2)                | 470 (20.7)                      |            |
| Moderate                                                             | 165 (50.9)               | 996 (43.9)                      |            |
| Poor                                                                 | 85 (26.2)                | 206 (9.1)                       |            |

|                             |            |             |        |
|-----------------------------|------------|-------------|--------|
| Vascular invasion - no. (%) |            |             | <0.001 |
| None                        | 179 (54.2) | 1869 (80.8) |        |
| Microvascular invasion      | 121 (36.7) | 398 (17.2)  |        |
| Macrovascular invasion      | 30 (9.1)   | 47 (2.0)    |        |

**eTable 3.** Comparison of Recurrent Tumor Characteristics of by Treatment Modality

| Comparison of Recurrent Tumor Characteristics of by Treatment Modality |                   |                         |        |
|------------------------------------------------------------------------|-------------------|-------------------------|--------|
| Variable                                                               | Resection (n=101) | Other treatment (n=215) | P      |
| Milan criteria at transplant                                           |                   |                         | 0.077  |
| Within                                                                 | 87 (86.1)         | 167 (77.7)              |        |
| Outside                                                                | 14 (13.9)         | 48 (22.3)               |        |
| AFP at transplant - no. (%)                                            |                   |                         | 0.232  |
| < 200                                                                  | 82 (83.7)         | 159 (75.0)              |        |
| 200 - 1000                                                             | 10 (10.2)         | 34 (16.0)               |        |
| > 1000                                                                 | 6 (6.1)           | 19 (9.0)                |        |
| Downstaged to Milan - no. (%)                                          | 19 (18.9)         | 32 (14.9)               | 0.376  |
| Size of largest viable tumor on explant pathology - median (IQR), cm   | 3.0 (2.0-4.6)     | 3.0 (1.9-5.0)           | 0.460  |
| Tumor differentiation - no. (%)                                        |                   |                         | 0.537  |
| Complete necrosis/no viable tumor                                      | 9 (9.1)           | 18 (8.5)                |        |
| Well differentiated                                                    | 15 (15.2)         | 30 (14.2)               |        |
| Moderately differentiated                                              | 55 (55.6)         | 104 (49.3)              |        |
| Poorly differentiated                                                  | 20 (20.2)         | 59 (30.0)               |        |
| Vascular invasion on explant pathology - no. (%)                       |                   |                         | 0.148  |
| None                                                                   | 58 (57.4)         | 109 (50.7)              |        |
| Microvascular invasion                                                 | 38 (37.6)         | 81 (37.7)               |        |
| Macrovascular invasion                                                 | 5 (5.0)           | 25 (11.6)               |        |
| Time to recurrence - median (IQR), months                              | 25 (12.6-40.8)    | 14.2 (6.8-28.5)         | <0.001 |
| Time to recurrence - no. (%)                                           |                   |                         | 0.001  |
| < 1 year                                                               | 25 (24.8)         | 94 (43.7)               |        |
| > 1 year                                                               | 76 (75.3)         | 121 (56.3)              |        |
| Number of recurrent tumors - no. (%)                                   |                   |                         | <0.001 |
| Solitary                                                               | 70 (69.3)         | 53 (23.9)               |        |
| Multiple                                                               | 31 (30.7)         | 160 (75.1)              |        |
| Size of recurrence - median (IQR), cm                                  | 2.5 (1.4-3.8)     | 2.8 (1.7-4.7)           | 0.148  |

|                              |           |            |        |
|------------------------------|-----------|------------|--------|
| Site of recurrence - no. (%) |           |            | <0.001 |
| Intrahepatic                 | 4 (4.0)   | 40 (18.6)  |        |
| Extrahepatic                 | 90 (89.1) | 122 (56.7) |        |
| Both intra and extrahepatic  | 7 (6.9)   | 53 (24.7)  |        |
| AFP at recurrence - no. (%)  |           |            | 0.033  |
| < 200                        | 71 (73.2) | 119 (60.7) |        |
| 200-1000                     | 15 (15.5) | 30 (15.3)  |        |
| > 1000                       | 11 (11.3) | 47 (24.0)  |        |

**eTable 4.** Factors Associated With Survival After Liver Transplantation

| Multivariate Predictors of Post-Recurrence Mortality (n=330) |                  |         |
|--------------------------------------------------------------|------------------|---------|
| Variable                                                     | HR (95% CI)      | P-Value |
| <b>Time to recurrence</b>                                    |                  |         |
| > 1 year                                                     | Reference        | -       |
| < 1 year                                                     | 2.06 (1.51-2.80) | <0.001  |
| <b>Multiple recurrent tumors</b>                             |                  |         |
|                                                              | 1.62 (1.17-2.25) | 0.003   |
| <b>AFP at recurrence</b>                                     |                  |         |
| < 200                                                        | Reference        | -       |
| 200 - 1000                                                   | 1.28 (0.86-1.90) | 0.231   |
| > 1000                                                       | 1.98 (1.34-2.93) | <0.001  |
| <b>Site of recurrence</b>                                    |                  |         |
| Extrahepatic                                                 | Reference        | -       |
| Intrahepatic                                                 | 1.42 (0.90-2.23) | 0.128   |
| Both intra- and extrahepatic                                 | 1.45 (1.01-2.09) | 0.045   |
| <b>Treatment of recurrence</b>                               |                  |         |
| Systemic therapy alone                                       | Reference        | -       |
| Resection                                                    | 0.60 (0.41-0.89) | 0.011   |
| LRT                                                          | 0.77 (0.53-1.14) | 0.194   |
| Supportive care                                              | 5.78 (3.54-9.42) | <0.001  |
|                                                              |                  |         |



eFigure 1. Cohort Diagram

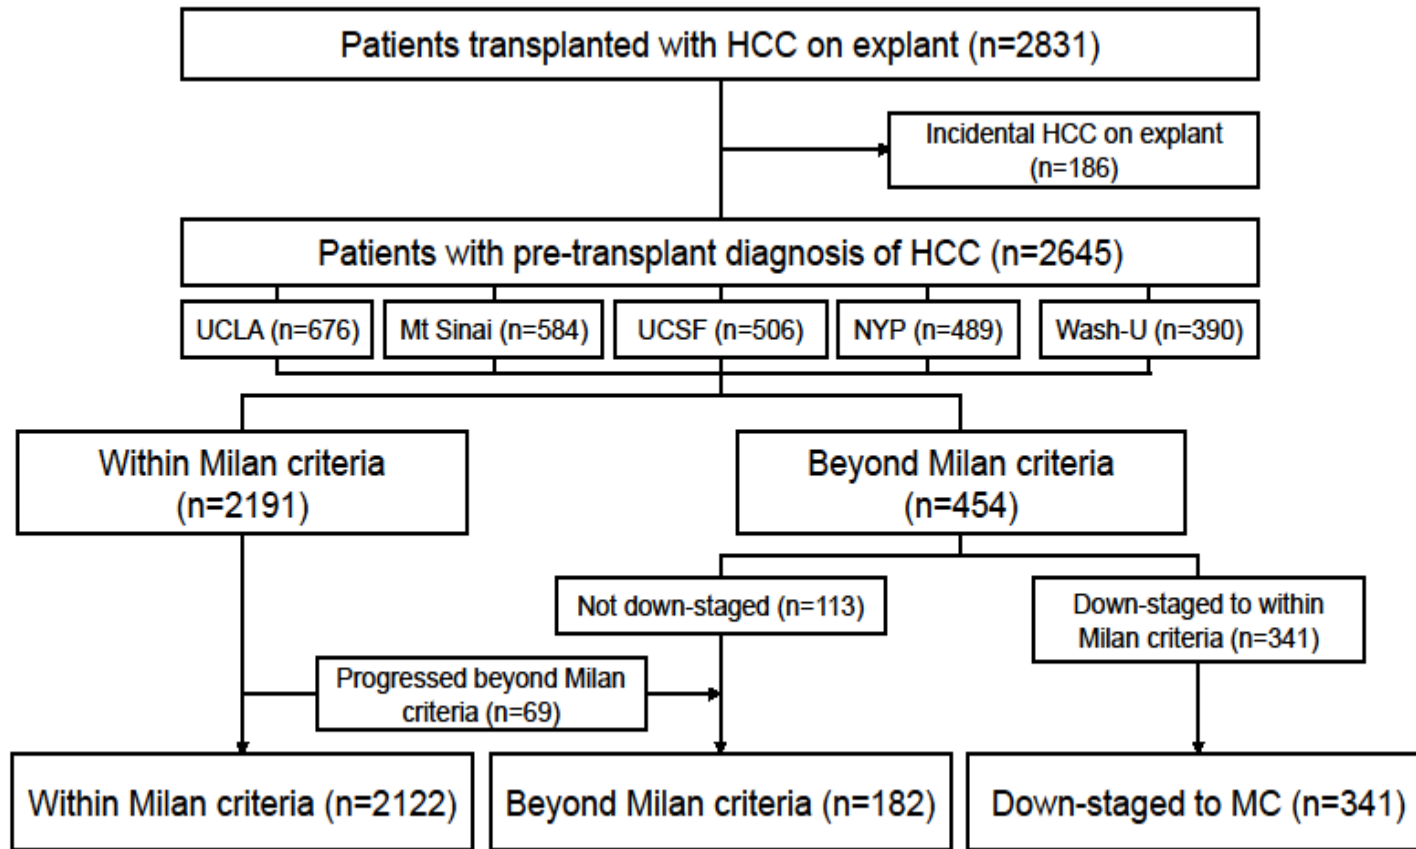

**eFigure 2.** Overall Survival and Recurrence of the Whole Cohort of 2645 Patients With HCC After Transplantation

A, Actuarial probability of overall survival. B, Actuarial probability of recurrence

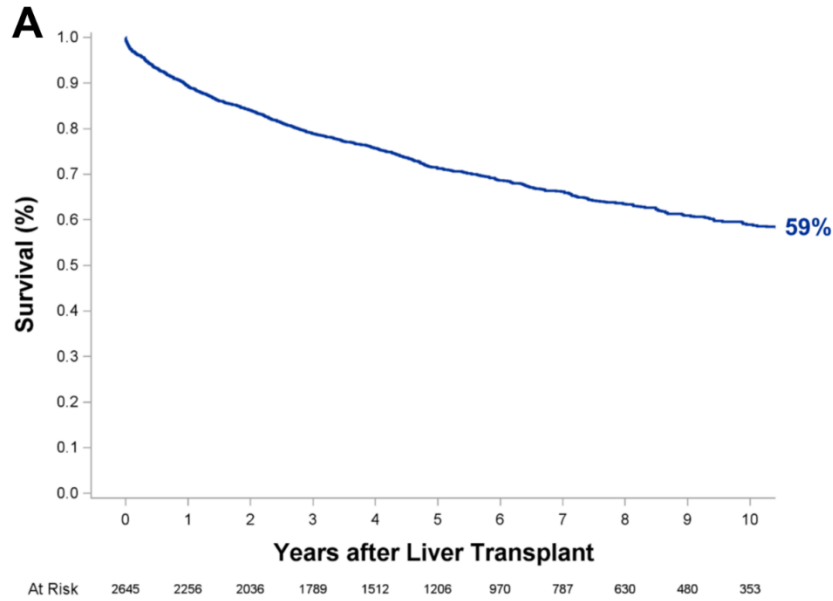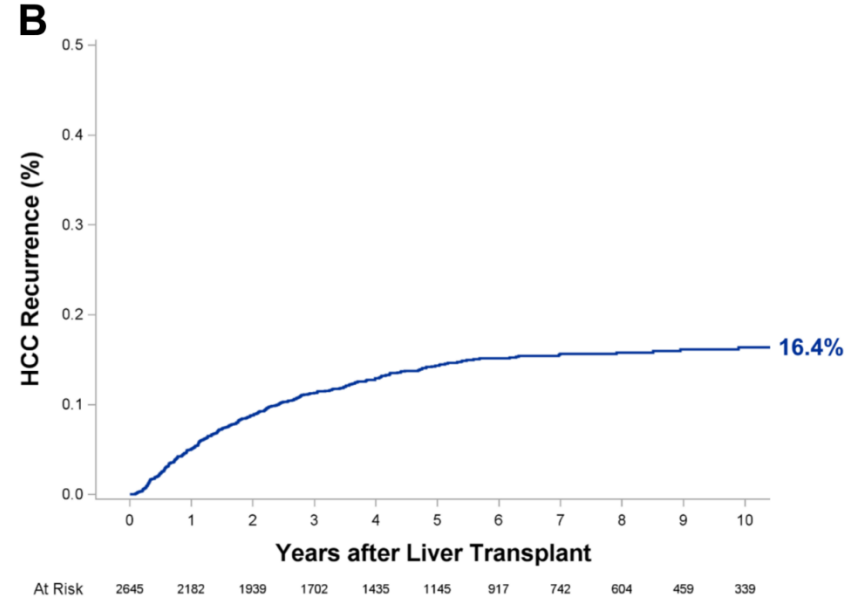

Supplement: jamasurg-e222800-s001.pdf [file jamasurg-e222800-s001.pdf]
